# Supplementary material
Source: PubMed Central journal article supplement (PMC4168308)
Supplement: supp_deu102_deu102_suppl_table1.pdf [file supp_deu102_deu102_suppl_table1.pdf]

**Supplementary Table S1** Derived semen quality parameters [mean (95% CI)] according to the intake of sugar-sweetened beverages.

|                                                      | Sugar-sweetened beverage |                   |                   |                   | <i>P</i> <sup>a</sup> <sub>trend</sub> |
|------------------------------------------------------|--------------------------|-------------------|-------------------|-------------------|----------------------------------------|
|                                                      | Q1                       | Q2                | Q3                | Q4                |                                        |
| <i>N</i>                                             | 48                       | 45                | 48                | 48                |                                        |
| Sugar-sweetened beverage intake median, servings/day | 0.11                     | 0.42              | 0.95              | 2.72              |                                        |
| Total sperm count (millions)                         |                          |                   |                   |                   |                                        |
| Crude                                                | 141 (103, 193)           | 123 (89, 170)     | 147 (107, 200)    | 147 (107, 200)    | 0.66                                   |
| Model 1 <sup>b</sup>                                 | 137 (101, 186)           | 133 (97, 181)     | 155 (115, 209)    | 133 (97, 182)     | 0.92                                   |
| Model 2 <sup>c</sup>                                 | 125 (91, 172)            | 127 (93, 172)     | 160 (119, 216)    | 146 (105, 203)    | 0.55                                   |
| Model 3 <sup>d</sup>                                 | 126 (90, 177)            | 128 (94, 174)     | 160 (119, 215)    | 144 (101, 206)    | 0.66                                   |
| Total motile count (millions) <sup>e</sup>           |                          |                   |                   |                   |                                        |
| Crude                                                | 85 (60, 121)             | 81 (56, 115)      | 91 (64, 129)      | 81 (57, 115)      | 0.86                                   |
| Model 1 <sup>b</sup>                                 | 84 (60, 117)             | 89 (63, 126)      | 95 (68, 133)      | 72 (50, 101)      | 0.40                                   |
| Model 2 <sup>c</sup>                                 | 74 (52, 105)             | 83 (59, 116)      | 100 (72, 138)     | 83 (58, 119)      | 0.88                                   |
| Model 3 <sup>d</sup>                                 | 77 (53, 111)             | 84 (59, 117)      | 100 (72, 139)     | 80 (54, 118)      | 0.91                                   |
| Progressive motile count (millions) <sup>e</sup>     |                          |                   |                   |                   |                                        |
| Crude                                                | 78 (55, 112)             | 75 (52, 108)      | 85 (60, 122)      | 73 (51, 104)      | 0.80                                   |
| Model 1 <sup>b</sup>                                 | 77 (55, 109)             | 83 (58, 118)      | 89 (63, 126)      | 65 (45, 92)       | 0.35                                   |
| Model 2 <sup>c</sup>                                 | 68 (48, 97)              | 77 (54, 109)      | 93 (67, 131)      | 75 (52, 109)      | 0.93                                   |
| Model 3 <sup>d</sup>                                 | 70 (48, 103)             | 77 (54, 110)      | 94 (67, 131)      | 72 (49, 108)      | 0.88                                   |
| Total normal count (millions)                        |                          |                   |                   |                   |                                        |
| Crude                                                | 25.5 (16.8, 34.2)        | 21.5 (12.6, 30.5) | 25.4 (16.7, 34.0) | 22.2 (13.5, 30.9) | 0.73                                   |
| Model 1 <sup>b</sup>                                 | 24.4 (15.9, 32.9)        | 23.8 (15.1, 32.4) | 26.2 (17.8, 34.6) | 20.4 (11.6, 29.1) | 0.92                                   |
| Model 2 <sup>c</sup>                                 | 23.2 (14.2, 32.2)        | 23.4 (14.7, 32.0) | 27.4 (19.0, 35.8) | 20.8 (11.5, 30.0) | 0.63                                   |
| Model 3 <sup>d</sup>                                 | 26.4 (16.9, 35.8)        | 23.7 (15.0, 32.4) | 27.7 (19.4, 36.1) | 16.9 (7.0, 26.9)  | 0.20                                   |

<sup>a</sup>Estimated using median intake in each quartile as a continuous variable.<sup>b</sup>Adjusted for total energy intake and abstinence time.<sup>c</sup>Adjusted for total energy intake, abstinence time, age, smoking status, alcohol, caffeine, total protein intake, total fat intake, TV viewing hours and physical activity.<sup>d</sup>Adjusted for total energy intake, abstinence time, age, smoking status, alcohol, caffeine, total protein intake, total fat intake, TV viewing hours, physical activity, BMI, and the Prudent and Western dietary patterns.<sup>e</sup>Additionally adjusted for time from ejaculation to start of semen analysis.
