# Supplementary material
Source: PubMed Central journal article supplement (PMC4168308)
Supplement: supp_deu102_deu102_suppl_table2.pdf [file supp_deu102_deu102_suppl_table2.pdf]

**Supplementary Table SII Adjusted<sup>a</sup> differences<sup>b</sup> (95% CI) of total sperm motility and total progressive motility at different cut points of sugar-sweetened beverage (SSB) intake.**

| Sugar-sweetened beverage intake cut point (serving/day) | All men (N = 189)                                      |                                                             | Men with BMI < 25 kg/m <sup>2</sup> (N = 111)          |                                                             |
|---------------------------------------------------------|--------------------------------------------------------|-------------------------------------------------------------|--------------------------------------------------------|-------------------------------------------------------------|
|                                                         | Adjusted differences in total sperm motility, % motile | Adjusted difference in progressive sperm motility, % motile | Adjusted differences in total sperm motility, % motile | Adjusted difference in progressive sperm motility, % motile |
| 0.5                                                     | -3.72 (-5.55, 3.79)                                    | -0.01 (-4.98, 4.96)                                         | -1.25 (-7.91, 5.42)                                    | 0.13 (-7.04, 7.31)                                          |
| 0.75                                                    | -4.16 (-8.61, 0.28)                                    | -3.79 (-8.53, 0.96)                                         | -6.56 (-12.81, -0.31)                                  | -6.37 (-13.11, 0.37)                                        |
| 1                                                       | -5.27 (-10.04, -0.50)                                  | -5.37 (-10.45, -0.28)                                       | -8.73 (-14.74, -2.72)                                  | -9.20 (-15.67, -2.74)                                       |
| 1.25                                                    | -6.07 (-11.36, -0.78)                                  | -6.33 (-11.97, -0.70)                                       | -9.57 (-16.13, -3.01)                                  | -10.61 (-17.65, -3.57)                                      |
| 1.5                                                     | -8.21 (-14.47, -1.95)                                  | -9.78 (-16.42, -3.15)                                       | -15.95 (-23.96, -7.94)                                 | -18.53 (-27.05, -10.02)                                     |
| 1.75                                                    | -7.93 (-14.69, -1.16)                                  | -9.93 (-17.10, -2.77)                                       | -13.06 (-21.65, -4.48)                                 | -15.80 (-24.93, -6.66)                                      |
| 2                                                       | -7.60 (-14.61, -0.59)                                  | -9.79 (-17.21, -2.36)                                       | -13.06 (-21.65, -4.48)                                 | -15.80 (-24.93, -6.66)                                      |

<sup>a</sup>Adjusted for total energy intake, abstinence time, age, smoking status, alcohol, caffeine, total protein intake, total fat intake, TV viewing hours, physical activity, BMI, and the Prudent and Western dietary patterns and time from current ejaculation to start of semen analysis.

<sup>b</sup>Estimates are the adjusted sperm motility between men with SSB consumption above cut point and men with SSB consumption below the cut point.
